# Supplementary material for: Non-human Primate Determinants of Natural Killer Cells in Tissues at Steady-State and During Simian Immunodeficiency Virus Infection
Source: PubMed Central journal article supplement (PMC7511519; doi:10.3389/fimmu.2020.02134), 2020-09-10
Supplement: Data_Sheet_1.pdf [file Data_Sheet_1.pdf]

## Supplementary Figure 1

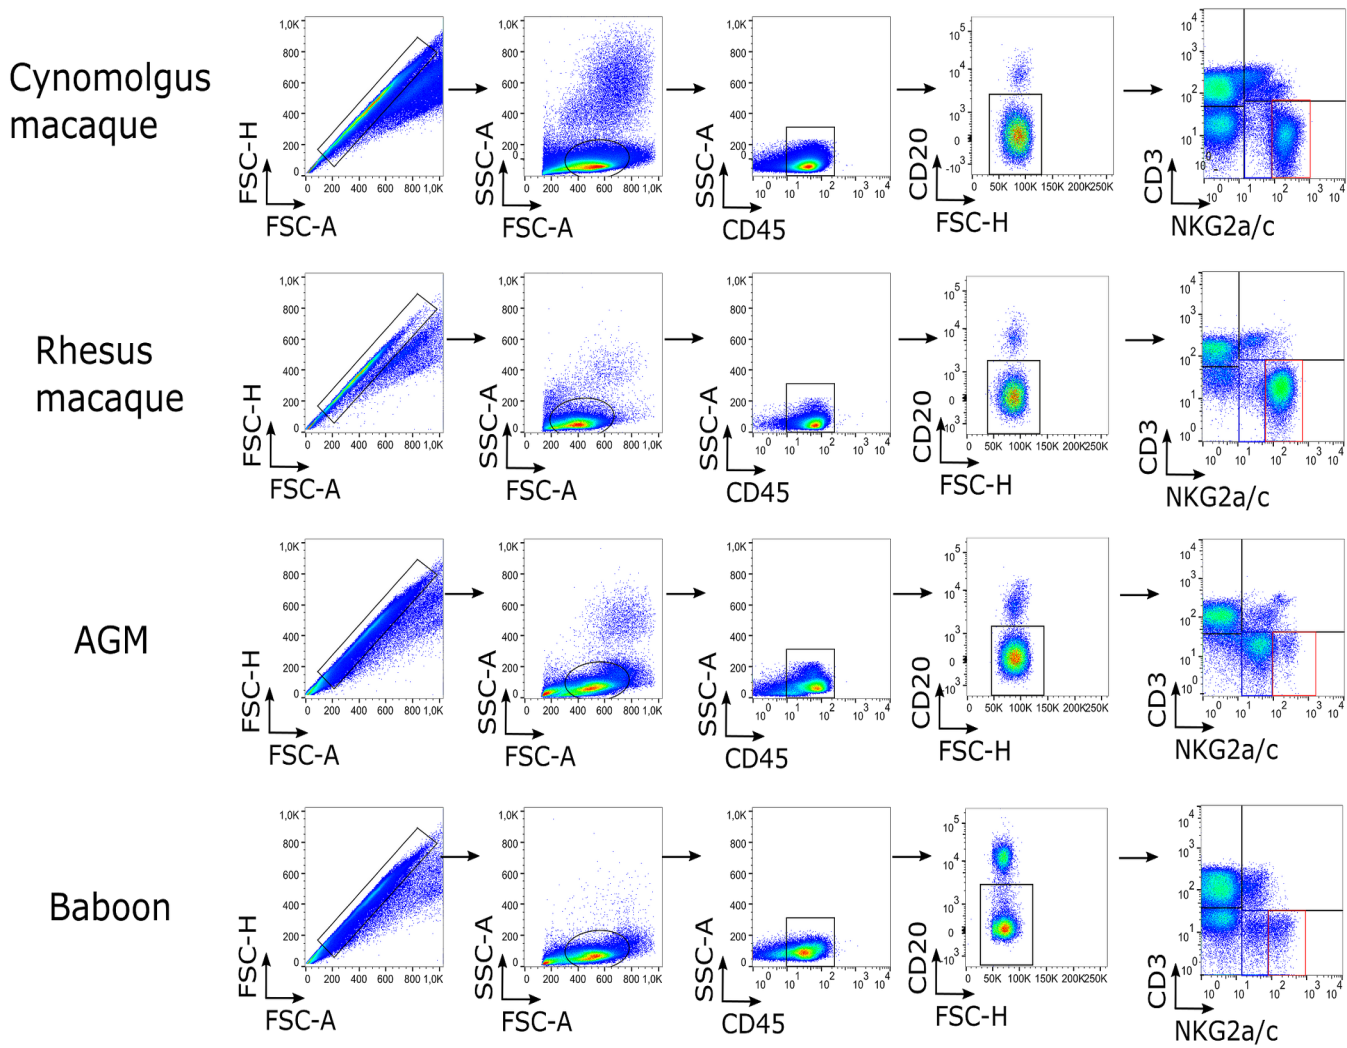

**Supplemental Figure 1:** main step of the gating strategy used to analyze NK cells defined as  $CD45^+CD3^+CD14^-CD20^-NKG2_{a/c}^+$  cells. Representative plots are shown as they were used to identify corresponding cells.

## Supplementary Figure 2

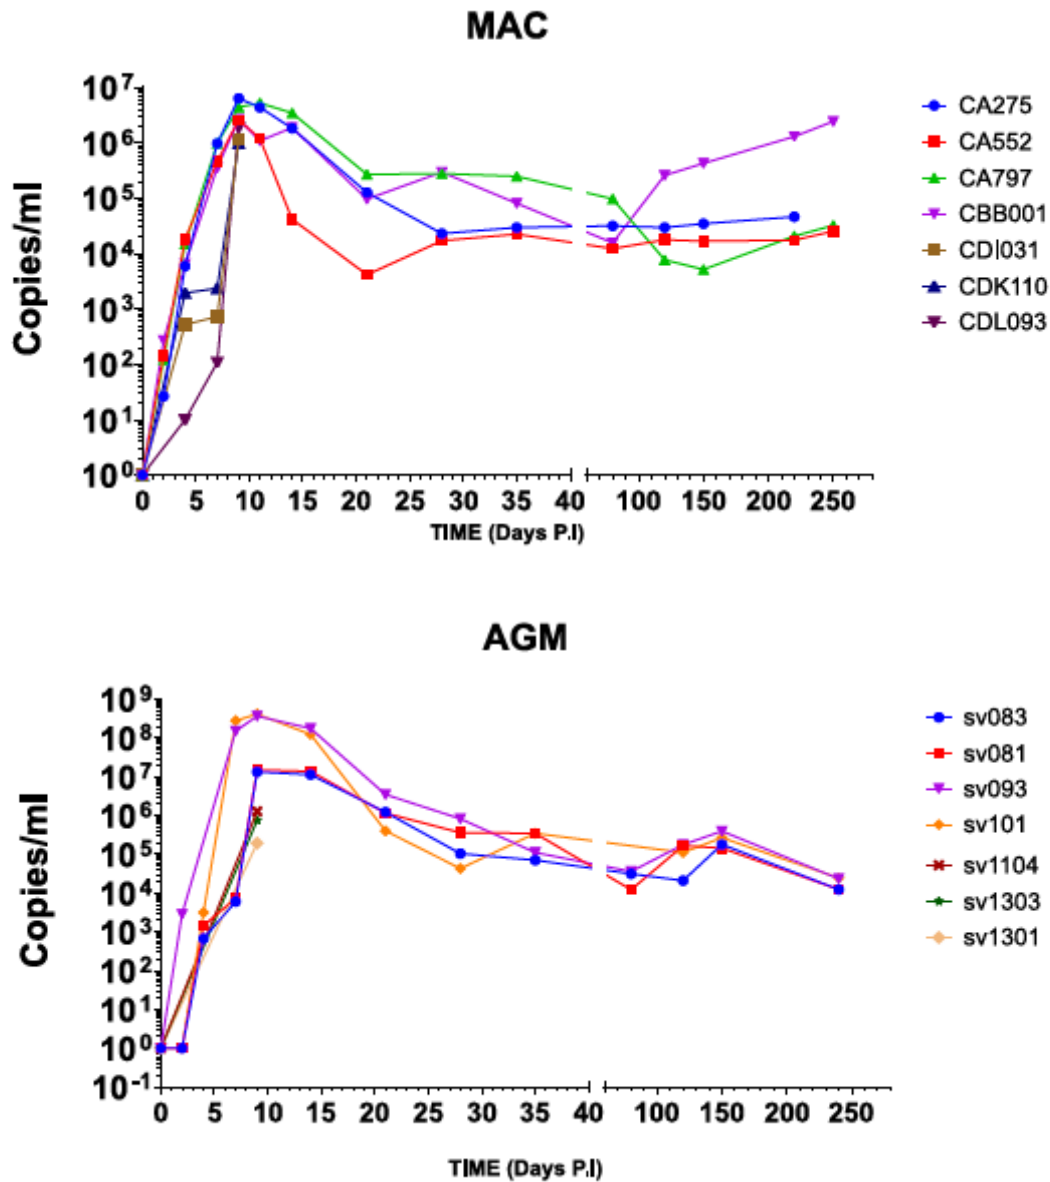

**Supplemental Figure 2:** Viremia profiles during SIV infections. Seven CM and seven AGM were respectively infected with SIVmac251 and SIVagm.sab92018. The SIV copy numbers in the plasma over time are indicated. Supplementary Table 1

## Supplementary Table 1

### Antibodies used for flow cytometry.

| Antibody         | Clone     | Suppliers             | Control       | Reference for Cross reactivity        |
|------------------|-----------|-----------------------|---------------|---------------------------------------|
| CD3              | SP34-2    | BD biosciences        | Isotype + FMO | Supplier and ref <sup>1-5</sup>       |
| CD45             | D058-1283 | BD biosciences        | Isotype + FMO | Supplier and ref <sup>4,5</sup>       |
| CD20             | 2H7       | Biolegend             | Isotype + FMO | Supplier and ref <sup>5-9</sup>       |
| NKG2A/C          | Z199      | Beckman Coulter, Inc. | Isotype + FMO | Supplier and ref <sup>5,6,10</sup>    |
| CD16             | 3G8       | Beckman Coulter, Inc. | Isotype + FMO | Supplier and ref <sup>5,6,9,10</sup>  |
| CXCR5            | MU5UBEE   | Thermo                | Isotype + FMO | Supplier and ref <sup>11</sup>        |
| CD8              | BW135/80  | Miltenyi              | Isotype + FMO | Supplier                              |
| CXCR3            | 1C6/CXCR3 | BD biosciences        | Isotype + FMO | Supplier and ref <sup>5,7,11,12</sup> |
| NKP30            | AF29-4D12 | Miltenyi              | Isotype + FMO | Supplier                              |
| CD69             | FN50      | BD biosciences        | Isotype + FMO | Supplier and ref <sup>8,12</sup>      |
| Nkp46            | BAB281    | Beckman Coulter, Inc. | Isotype + FMO | Supplier and ref <sup>10</sup>        |
| NKP44            | REA1163   | Miltenyi              | Isotype + FMO | Supplier                              |
| CD279(PD-1)      | EH12.2H7  | BD biosciences        | Isotype + FMO | Supplier and ref <sup>11</sup>        |
| Interferon gamma | 4S.B3     | BD biosciences        | Isotype + FMO | Supplier and ref <sup>6,13</sup>      |
| Granzyme B       | GB11      | BD biosciences        | Isotype + FMO | Supplier and ref <sup>6</sup>         |
| TNF- $\alpha$    | MAB11     | BD biosciences        | Isotype + FMO | Supplier and ref <sup>2,3,6,13</sup>  |
| CD14             | Tük4      | Miltenyi              | Isotype + FMO | Supplier <sup>15</sup>                |

- Nehete, P. N., Nehete, B. P., Chitta, S., Williams, L. E. & Abee, C. R. Phenotypic and Functional Characterization of Peripheral Blood Lymphocytes from Various Age- and Sex-Specific Groups of Owl Monkeys (*Aotus nancymaae*). *Comp. Med.* **67**, 67–78 (2017).
- Foulds, K. E., Donaldson, M. & Roederer, M. OMIP-005: Quality and phenotype of antigen-responsive rhesus macaque T cells. *Cytometry A* **81A**, 360–361 (2012).
- Sylwester, A. W., Hansen, S. G. & Picker, L. J. Quantification of T Cell Antigen-specific Memory Responses in Rhesus Macaques, Using Cytokine Flow Cytometry (CFC, also Known as ICS and ICCS): from Assay Set-up to Data Acquisition. *Bio-Protoc.* **4**, e1110–e1110 (2014).
- Gaufin, T. *et al.* Experimental depletion of CD8+ cells in acutely SIVagm-Infected African Green Monkeys results in increased viral replication. *Retrovirology* **7**, 42 (2010).
- Huot, N. *et al.* Natural killer cells migrate into and control simian immunodeficiency virus replication in lymph node follicles in African green monkeys. *Nat. Med.* **23**, 1277–1286 (2017).
- Weisgrau, K. L., Ries, M., Pomplun, N., Evans, D. T. & Rakasz, E. G. OMIP-035: Functional analysis of natural killer cell subsets in macaques. *Cytometry A* **89**, 799–802 (2016).
- Palgen, J.-L. *et al.* NK cell immune responses differ after prime and boost vaccination. *J. Leukoc. Biol.* **105**, 1055–1073 (2019).
- Amos, J. D. *et al.* Rapid Development of gp120-Focused Neutralizing B Cell Responses during Acute Simian Immunodeficiency Virus Infection of African Green Monkeys. *J. Virol.* **89**, 9485–9498 (2015).
- Sugimoto, C. *et al.* Differentiation Kinetics of Blood Monocytes and Dendritic Cells in Macaques: Insights to Understanding Human Myeloid Cell Development. *J. Immunol. Baltim. Md 1950* **195**, (2015).
- Mavilio, D. *et al.* Identification of NKG2A and Nkp80 as specific natural killer cell markers in rhesus and pigtailed monkeys. *Blood* **106**, 1718–1725 (2005).
- Donaldson, M. M., Kao, S.-F. & Foulds, K. E. OMIP-052: An 18-Color Panel for Measuring Th1, Th2, Th17, and Tfh Responses in Rhesus Macaques. *Cytometry A* **95**, 261–263 (2019).
- Jacquelin, B. *et al.* Innate immune responses and rapid control of inflammation in African green monkeys treated or not with interferon-alpha during primary SIVagm infection. *PLoS Pathog.* **10**, e1004241 (2014).
- Hassan, W. M. *et al.* Multivariate profiling of African green monkey and rhesus macaque T lymphocytes. *Sci. Rep.* **9**, 4834 (2019).
- Schafer, J. L., Li, H., Evans, T. I., Estes, J. D. & Reeves, R. K. Accumulation of Cytotoxic CD16+ NK Cells in Simian Immunodeficiency Virus-Infected Lymph Nodes Associated with In Situ Differentiation and Functional Anergy. *J. Virol.* **89**, 6887–6894 (2015).
- Diop OM, Ploquin MJ, Mortara L, Faye A, Jacquelin B, Kunkel D, Lebon P, Butor C, Hosmalin A, Barré-Sinoussi F, Müller-Trutwin MC. Plasmacytoid dendritic cell dynamics and alpha interferon production during Simian immunodeficiency virus infection with a nonpathogenic outcome. *J Virol.* 2008 Jun;**82**(11):5145-52. Doi: 10.1128/JVI.02433-07. Epub 2008 Apr 2. PMID: 18385227; PMCID: PMC2395206.
